# Supplementary material for: Asymmetric, dynamic adaptation in prefrontal cortex during dichotic listening tasks
Source: PubMed Central journal article supplement (PMC7641958; doi:10.1117/1.nph.7.4.045008), 2020-11-04
Supplement: NPh_007_045008_SD001.pdf [file NPh_007_045008_SD001.pdf]

| Subject S255 | Dichotic 1 |    |               |            |  |           |    |               |  |            |
|--------------|------------|----|---------------|------------|--|-----------|----|---------------|--|------------|
| Trial #      | LEFT EAR   |    |               | # Correct  |  | RIGHT EAR |    |               |  | # Correct  |
| 0            | 1          | 2  | 10            | 3          |  | 5         | 6  | 3             |  | 3          |
| 1            | 3          | 10 | 2             | 2          |  | 3         | 4  | 2             |  | 3          |
| 2            | 5          | 6  | 2             | 2          |  | 4         | 1  | 3             |  | 3          |
| 3            | 2          | 4  | 1             | 2          |  | 3         | 2  | 6             |  | 2          |
| 4            | 5          | 4  | 1             | 1          |  | 5         | 3  | 5             |  | 3          |
| 5            | 5          | 5  | 2             | 1          |  | 5         | 10 | 3             |  | 3          |
| 6            | 5          | 4  | 10            | 2          |  | 1         | 5  | 6             |  | 2          |
| 7            | 5          | 4  | 10            | 2          |  | 2         | 3  | 1             |  | 2          |
| 8            | 10         | 4  | 8             | 2          |  | 3         | 6  | 1             |  | 3          |
| 9            | 1          | 4  | 3             | 2          |  | 2         | 6  | 10            |  | 2          |
| 10           | 5          | 2  | 2             | 3          |  | 5         | 4  | 10            |  | 2          |
| 11           | 5          | 2  | 10            | 2          |  | 5         | 4  | 2             |  | 2          |
| 12           | 2          | 10 | 5             | 2          |  | 6         | 4  | 3             |  | 2          |
| 13           | 2          | 3  | 4             | 2          |  | 2         | 5  | 3             |  | 2          |
| 14           | 3          | 2  | 10            | 3          |  | 2         | 4  | 5             |  | 1          |
| 15           | 5          | 4  | 5             | 1          |  | 3         | 1  | 3             |  | 2          |
| 16           | 5          | 3  | 1             | 2          |  | 10        | 3  | 2             |  | 2          |
| 17           | 2          | 4  | 6             | 2          |  | 3         | 9  | 6             |  | 2          |
| 18           | 1          | 4  | 6             | 2          |  | 2         | 3  | 9             |  | 2          |
| 19           | 1          | 5  | 4             | 2          |  | 10        | 6  | 3             |  | 2          |
| 20           | 1          | 4  | 10            | 3          |  | 2         | 2  | 2             |  | 2          |
| 21           | 3          | 5  | 2             | 3          |  | 6         | 10 | 4             |  | 2          |
| 22           | 2          | 1  | 4             | 2          |  | 5         | 2  | 3             |  | 3          |
| 23           | 2          | 5  | 2             | 2          |  | 10        | 3  | 6             |  | 3          |
| 24           | 4          | 1  | 3             | 3          |  | 10        | 2  | 6             |  | 2          |
| 25           | 4          | 5  | 2             | 3          |  | 10        | 2  | 3             |  | 2          |
| 26           | 5          | 1  | 6             | 3          |  | 10        | 9  | 4             |  | 2          |
| 27           | 5          | 10 | 1             | 2          |  | 4         | 2  | 2             |  | 3          |
| 28           | 2          | 4  | 1             | 2          |  | 3         | 10 | 6             |  | 3          |
| 29           | 2          | 3  | 6             | 3          |  | 3         | 5  | 10            |  | 3          |
|              |            |    | Total Correct | 66         |  |           |    | Total Correct |  | 70         |
|              |            |    | Accuracy      | 0.73333333 |  |           |    | Accuracy      |  | 0.77777778 |

**Table S1:** Sample dichotic block performance log for a single subject (S55). Red highlighting indicates incorrectly reported digit.

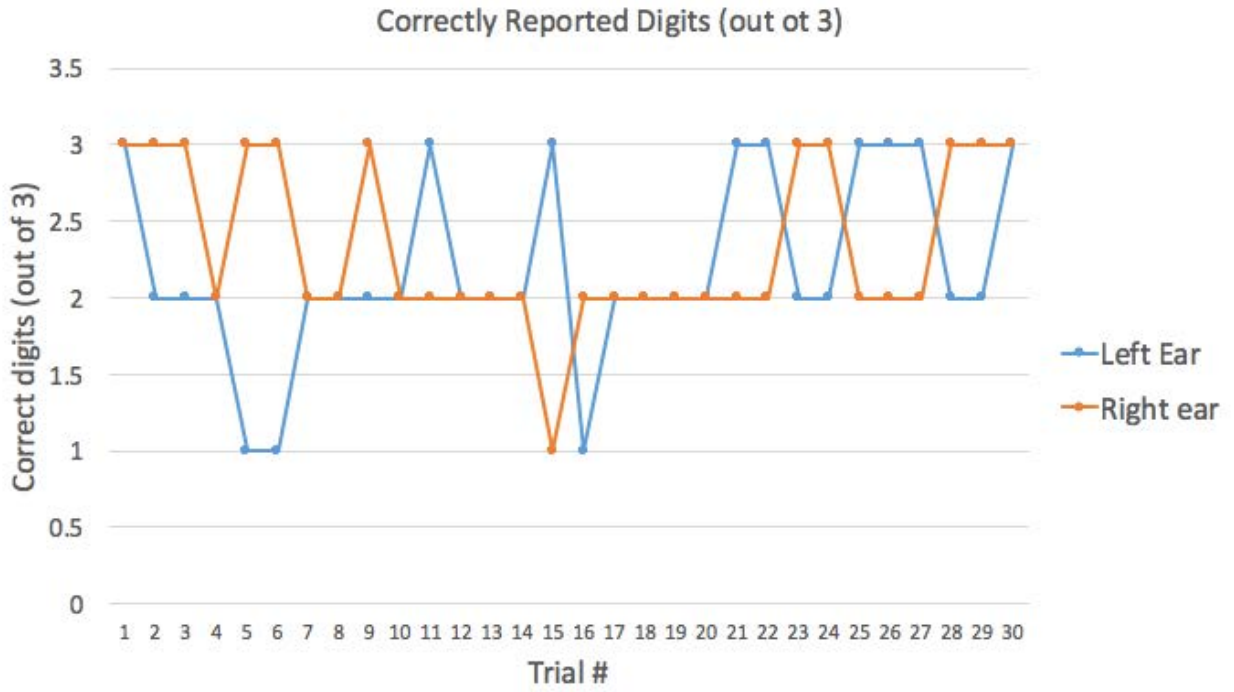

**Figure S1:** Plot of correctly reported digits per block for a representative study participant (raw data shown in Table S1)

**Table S2****Rest 1**

| Subject ID (randomized)          | Right / Left normalized BFI (mean $\pm$ SD) | Heartrate (bpm, mean $\pm$ SD)   | Frontal / Parietal EEG gamma spectral power (30-50Hz) z-score * | Listening task accuracy |
|----------------------------------|---------------------------------------------|----------------------------------|-----------------------------------------------------------------|-------------------------|
| S16                              | (used for normalization)                    | 76.9 $\pm$ 2.6                   | (rest used as reference for z-scores)                           | NA                      |
| S46                              | (used for normalization)                    | 65.4 $\pm$ 3.4                   | (rest used as reference for z-scores)                           | NA                      |
| S59                              | (used for normalization)                    | 59.6 $\pm$ 2.6                   | (rest used as reference for z-scores)                           | NA                      |
| S87                              | (used for normalization)                    | **                               | (rest used as reference for z-scores)                           | NA                      |
| S44                              | (used for normalization)                    | 69.0 $\pm$ 2.1                   | (rest used as reference for z-scores)                           | NA                      |
| S22                              | (used for normalization)                    | 60.7 $\pm$ 27.5                  | (rest used as reference for z-scores)                           | NA                      |
| S57                              | (used for normalization)                    | 72.4 $\pm$ 2.5                   | (rest used as reference for z-scores)                           | NA                      |
| S55                              | (used for normalization)                    | 80.7 $\pm$ 2.4                   | (rest used as reference for z-scores)                           | NA                      |
| S80                              | (used for normalization)                    | 74.5 $\pm$ 2.3                   | (rest used as reference for z-scores)                           | NA                      |
| S30                              | (used for normalization)                    | 72.3 $\pm$ 4.2                   | (rest used as reference for z-scores)                           | NA                      |
| S47                              | (used for normalization)                    | 75.1 $\pm$ 2.3                   | (rest used as reference for z-scores)                           | NA                      |
| S20                              | (used for normalization)                    | 64.7 $\pm$ 3.8                   | (rest used as reference for z-scores)                           | NA                      |
| S83                              | (used for normalization)                    | 70.5 $\pm$ 2.1                   | (rest used as reference for z-scores)                           | NA                      |
| <b>Average over all subjects</b> | <b>1 / 1</b>                                | <b>69.9 <math>\pm</math> 6.8</b> |                                                                 |                         |

\* z-score for EEG is computed using the previous rest block's standard deviation

\*\* Heart rate error high because the optical sampling rate was low (adjusted from subject to subject to improve S/N)  
*P* values in BFI and heart rate compare the particular block to the value measured at the first rest period (2-tailed Student's t-test). "NS" implies *P* > 0.05.

**Diotic digits**

| Subject ID (randomized)          | Right / Left normalized BFI (mean $\pm$ SD)                                                             | Heartrate (bpm, mean $\pm$ SD)                        | Frontal / Parietal EEG gamma spectral power (30-50Hz) z-score * | Listening task accuracy |
|----------------------------------|---------------------------------------------------------------------------------------------------------|-------------------------------------------------------|-----------------------------------------------------------------|-------------------------|
| S16                              | 12.0 $\pm$ 15 % / 19.6 $\pm$ 17.4%                                                                      | 81.0 $\pm$ 4.0                                        | (unstable) / (unstable)                                         | 100%                    |
| S46                              | —                                                                                                       | —                                                     | —                                                               | —                       |
| S59                              | 4.9 $\pm$ 7.5% / 6.9 $\pm$ 23.1%                                                                        | 58.8 $\pm$ 3.7                                        | 3.9 / 2.6                                                       | 100%                    |
| S87                              | —                                                                                                       | —                                                     | —                                                               | —                       |
| S44                              | 11.4 $\pm$ 5.7% / 6.1 $\pm$ 33.1%                                                                       | 78.2 $\pm$ 4.2                                        | (unstable) / 1.5                                                | 100%                    |
| S22                              | —                                                                                                       | —                                                     | —                                                               | —                       |
| S57                              | 38.7 $\pm$ 10.4% / 22.2 $\pm$ 13.5%                                                                     | 79.5 $\pm$ 23.5                                       | 3.6 / (unstable)                                                | 100%                    |
| S55                              | 3.9 $\pm$ 37.8% / 9.9 $\pm$ 4.35%                                                                       | 84.0 $\pm$ 14.8                                       | 0.2 / 0.6                                                       | 100%                    |
| S80                              | 44.9 $\pm$ 16.5% / 8.2 $\pm$ 7.6%                                                                       | 83.1 $\pm$ 9.0                                        | 1.1 / 3.7                                                       | 100%                    |
| S30                              | 18.4 $\pm$ 10.2% / 14.8 $\pm$ 8.3%                                                                      | **                                                    | 2.6 / 2.5                                                       | 100%                    |
| S47                              | 12.6 $\pm$ 14.5% / 7.2 $\pm$ 22.5%                                                                      | 80.3 $\pm$ 4.7                                        | (unstable) / (unstable)                                         | 100%                    |
| S20                              | —                                                                                                       | —                                                     | —                                                               | —                       |
| S83                              | —                                                                                                       | —                                                     | —                                                               | —                       |
| <b>Average over all subjects</b> | <b>18.4 <math>\pm</math> 15.2% / 11.8 <math>\pm</math> 6.2%<br/><i>P</i> = 0.011 / <i>P</i> = 0.001</b> | <b>77.8 <math>\pm</math> 8.6<br/><i>P</i> = 0.006</b> |                                                                 | 100%                    |

## Rest 2

| Subject ID (randomized)   | Right / Left normalized BFI (mean $\pm$ SD)                             | Heartrate (bpm, mean $\pm$ SD) | Frontal / Parietal EEG gamma spectral power (30-50Hz) z-score * | Listening task accuracy |
|---------------------------|-------------------------------------------------------------------------|--------------------------------|-----------------------------------------------------------------|-------------------------|
| S16                       | 6.2 $\pm$ 12.8 % / 16.2 $\pm$ 15.3%                                     | 82.4 $\pm$ 3.9                 | (unstable) / (unstable)                                         | NA                      |
| S46                       | —                                                                       | —                              | —                                                               | NA                      |
| S59                       | 4.8 $\pm$ 5.3% / 5.6 $\pm$ 14.7%                                        | 60.3 $\pm$ 4.2                 | -0.7 / -0.6                                                     | NA                      |
| S87                       | —                                                                       | —                              | —                                                               | NA                      |
| S44                       | 6.4 $\pm$ 6.4% / 10.7 $\pm$ 35.4%                                       | 72.6 $\pm$ 4.7                 | (unstable) / 1.1                                                | NA                      |
| S22                       | —                                                                       | —                              | —                                                               | NA                      |
| S57                       | 26.4 $\pm$ 6.9% / 4.3 $\pm$ 8.1%                                        | 71.0 $\pm$ 4.6                 | 1.3 / (unstable)                                                | NA                      |
| S55                       | 2.2 $\pm$ 7.4% / 4.4 $\pm$ 22.5%                                        | 84.1 $\pm$ 2.3                 | -3.2 / -0.3                                                     | NA                      |
| S80                       | 20.6 $\pm$ 21.9% / 5.6 $\pm$ 4.7%                                       | 83.1 $\pm$ 4.0                 | -0.9 / 0.8                                                      | NA                      |
| S30                       | 2.2 $\pm$ 4.8% / -3.7 $\pm$ 12.9%                                       | **                             | 2.5 / 0.8                                                       | NA                      |
| S47                       | 12.8 $\pm$ 6.7% / 20.9 $\pm$ 5.4%                                       | 75.2 $\pm$ 1.4                 | -2.3 / (unstable)                                               | NA                      |
| S20                       | —                                                                       | —                              | —                                                               | NA                      |
| S83                       | —                                                                       | —                              | —                                                               | NA                      |
| Average over all subjects | 10.2 $\pm$ 9.0% / 8.0 $\pm$ 7.7%<br><i>P</i> = 0.014 / <i>P</i> = 0.021 | 75.5 $\pm$ 8.6<br><i>NS</i>    |                                                                 |                         |

## Dichotic digits 1

| Subject ID (randomized)   | Right / Left normalized BFI (mean $\pm$ SD)                               | Heartrate (bpm, mean $\pm$ SD)      | Frontal / Parietal EEG gamma spectral power (30-50Hz) z-score * | Listening task accuracy (right / left)                            |
|---------------------------|---------------------------------------------------------------------------|-------------------------------------|-----------------------------------------------------------------|-------------------------------------------------------------------|
| S16                       | 23.9 $\pm$ 19.4 % / 35.1 $\pm$ 20.8%                                      | 79.7 $\pm$ 5.8                      | (unstable) / (unstable)                                         | 98% / 97%                                                         |
| S46                       | 25.7 $\pm$ 4.3 % / 27.5 $\pm$ 7.4%                                        | 69.8 $\pm$ 2.9                      | 4.2 / 4.6                                                       | 84% / 76%                                                         |
| S59                       | 9.2 $\pm$ 8.5% / 10.7 $\pm$ 29.7%                                         | 61.7 $\pm$ 7.6                      | 5.9 / 4.9                                                       | 89% / 76%                                                         |
| S87                       | 12.0 $\pm$ 8.2% / 19.8 $\pm$ 7.9%                                         | **                                  | 1.46 / 3.21                                                     | 95% / 92%                                                         |
| S44                       | 35.9 $\pm$ 13.1% / 8.5 $\pm$ 30.5%                                        | 82.9 $\pm$ 5.8                      | 2.6 / 3.7                                                       | 87% / 83%                                                         |
| S22                       | 27.8 $\pm$ 10.6% / 24.8 $\pm$ 4.4%                                        | **                                  | 2.5 / 3.6                                                       | 95% / 82%                                                         |
| S57                       | 59.2 $\pm$ 16.0% / 32.1 $\pm$ 29%                                         | **                                  | (unstable) / (unstable)                                         | 98% / 100%                                                        |
| S55                       | 9.0 $\pm$ 18.5% / 7.5 $\pm$ 32%                                           | 86.1 $\pm$ 3.9                      | 2.6 / 6.2                                                       | 78% / 73%                                                         |
| S80                       | 63.4 $\pm$ 21.2% / 20.4 $\pm$ 7.7%                                        | 88.3 $\pm$ 6.93                     | 3.5 / 4.1                                                       | 95% / 84%                                                         |
| S30                       | 27.9 $\pm$ 13.9% / 18.3 $\pm$ 9.5%                                        | 86.1 $\pm$ 8.9                      | 2.6 / 3.1                                                       | 83% / 81%                                                         |
| S47                       | 16.4 $\pm$ 19.1% / 24.0 $\pm$ 13.5%                                       | **                                  | (unstable) / (unstable)                                         | 83% / 82%                                                         |
| S20                       | 10.2 $\pm$ 10.7% / 33.0 $\pm$ 7.6%                                        | 71.5 $\pm$ 4.8                      | 4.5 / 3.5                                                       | 88% / 92%                                                         |
| S83                       | 10.8 $\pm$ 11.3% / 9.0 $\pm$ 3.3%                                         | 86.7 $\pm$ 8.0                      | 4.2 / 6.1                                                       | 89% / 84%                                                         |
| Average over all subjects | 25.5 $\pm$ 11.3% / 20.7 $\pm$ 9.6%<br><i>P</i> = 2.7e-4 <i>P</i> = 5.1e-6 | 80.2 $\pm$ 9.4<br><i>P</i> = 4.5e-4 |                                                                 | 89.3 $\pm$ 6.5% / 84.8 $\pm$ 8.2%<br><i>P</i> = 0.01 <sup>‡</sup> |

<sup>‡</sup> *P*-value represents significance of right / left ear performance difference

### Rest 3

| Subject ID (randomized)          | Right / Left normalized BFI (mean $\pm$ SD)                                                             | Heartrate (bpm, mean $\pm$ SD)                 | Frontal / Parietal EEG gamma spectral power (30-50Hz) z-score * | Listening task accuracy |
|----------------------------------|---------------------------------------------------------------------------------------------------------|------------------------------------------------|-----------------------------------------------------------------|-------------------------|
| S16                              | 10.5 $\pm$ 8.0 % / 14.5 $\pm$ 28.0%                                                                     | 79.7 $\pm$ 10.2                                | (unstable) / (unstable)                                         | NA                      |
| S46                              | 21.1 $\pm$ 4.3 % / 13.8 $\pm$ 11.6%                                                                     | 66.2 $\pm$ 4.7                                 | 2.6 / 0.09                                                      | NA                      |
| S59                              | 14.7 $\pm$ 7.3% / 19.1 $\pm$ 20.4%                                                                      | 62.1 $\pm$ 3.8                                 | 3.3 / -0.1                                                      | NA                      |
| S87                              | 2.3 $\pm$ 7.7% / 0.8 $\pm$ 6.3%                                                                         | 84.9 $\pm$ 5.9                                 | 2.0 / -2.1                                                      | NA                      |
| S44                              | 16.8 $\pm$ 5.7% / 10.7 $\pm$ 29.5%                                                                      | 73.3 $\pm$ 3.3                                 | 3.4 / 0.08                                                      | NA                      |
| S22                              | 15.6 $\pm$ 9.5% / 7.8 $\pm$ 5.0%                                                                        | **                                             | 2.7 / -0.02                                                     | NA                      |
| S57                              | 51.4 $\pm$ 10.1% / 20.8 $\pm$ 18.5%                                                                     | 69.4 $\pm$ 5.1                                 | 2.2 / (unstable)                                                | NA                      |
| S55                              | 4.7 $\pm$ 21.1% / 3.8 $\pm$ 33.4%                                                                       | 82.0 $\pm$ 4.2                                 | 1.7 / 1.8                                                       | NA                      |
| S80                              | 21.5 $\pm$ 8.5% / 17.8 $\pm$ 7.4%                                                                       | 79.5 $\pm$ 2.5                                 | 2.5 / (unstable)                                                | NA                      |
| S30                              | 1.4 $\pm$ 7.9% / 2.8 $\pm$ 4.0%                                                                         | **                                             | 0.4 / (unstable)                                                | NA                      |
| S47                              | 4.2 $\pm$ 11.3% / 10.0 $\pm$ 8.4%                                                                       | 75.2 $\pm$ 2.3                                 | (unstable) / (unstable)                                         | NA                      |
| S20                              | 0.2 $\pm$ 4.9% / 17.3 $\pm$ 6.0%                                                                        | 64.9 $\pm$ 2.5                                 | 3.1 / 0.2                                                       | NA                      |
| S83                              | 3.5 $\pm$ 4.8% / 4.2 $\pm$ 5.5%                                                                         | 72.5 $\pm$ 3.6                                 | 3.1 / 4.5                                                       | NA                      |
| <b>Average over all subjects</b> | <b>12.9 <math>\pm</math> 13.8% / 11.0 <math>\pm</math> 6.7%<br/><i>P</i> = 0.038 / <i>P</i> = 0.019</b> | <b>73.6 <math>\pm</math> 7.4<br/><i>NS</i></b> |                                                                 |                         |

### Dichotic digits 2

| Subject ID (randomized)          | Right / Left normalized BFI (mean $\pm$ SD)                                                              | Heartrate (bpm, mean $\pm$ SD)                        | Frontal / Parietal EEG gamma spectral power (30-50Hz) z-score * | Listening task accuracy                                                      |
|----------------------------------|----------------------------------------------------------------------------------------------------------|-------------------------------------------------------|-----------------------------------------------------------------|------------------------------------------------------------------------------|
| S16                              | 32.4 $\pm$ 18.5% / 40.0 $\pm$ 15.7%                                                                      | 83.5 $\pm$ 11.3                                       | (unstable) / (unstable)                                         | 93% / 93%                                                                    |
| S46                              | —                                                                                                        | —                                                     | —                                                               | —                                                                            |
| S59                              | 11.0 $\pm$ 7.4% / 9.9 $\pm$ 18.0%                                                                        | 59.8 $\pm$ 4.5                                        | 4.7 / 3.1                                                       | 93% / 73%                                                                    |
| S87                              | —                                                                                                        | —                                                     | —                                                               | —                                                                            |
| S44                              | 36.1 $\pm$ 9.8% / 17.1 $\pm$ 29.4%                                                                       | 79.6 $\pm$ 3.5                                        | 4.2 / 3.2                                                       | 100% / 99%                                                                   |
| S22                              | —                                                                                                        | —                                                     | —                                                               | —                                                                            |
| S57                              | 66.5 $\pm$ 13.2% / 28.3 $\pm$ 11.5%                                                                      | 85.1 $\pm$ 5.3                                        | 3.9 / (unstable)                                                | 87% / 75%                                                                    |
| S55                              | 8.2 $\pm$ 19.3% / 8.5 $\pm$ 6.3%                                                                         | 84.8 $\pm$ 4.3                                        | 0.3 / 3.7                                                       | 89% / 95%                                                                    |
| S80                              | 70.7 $\pm$ 12.0% / 19.3 $\pm$ 7.2%                                                                       | 82.4 $\pm$ 4.6                                        | 0.4 / 4.5                                                       | 93% / 98%                                                                    |
| S30                              | 17.2 $\pm$ 8.7% / 14.6 $\pm$ 10.1%                                                                       | **                                                    | 4.8 / 3.1                                                       | 91% / 88%                                                                    |
| S47                              | 30.1 $\pm$ 22.1% / 18.2 $\pm$ 14.4%                                                                      | 86.5 $\pm$ 8.5                                        | (unstable) / (unstable)                                         | 84% / 92%                                                                    |
| S20                              | —                                                                                                        | —                                                     | —                                                               | —                                                                            |
| S83                              | —                                                                                                        | —                                                     | —                                                               | —                                                                            |
| <b>Average over all subjects</b> | <b>34.0 <math>\pm</math> 23.6% / 19.5 <math>\pm</math> 10.3%<br/><i>P</i> = 0.004 / <i>P</i> = 0.001</b> | <b>80.2 <math>\pm</math> 9.3<br/><i>P</i> = 0.004</b> |                                                                 | <b>91.2 <math>\pm</math> 4.8% / 89.1 <math>\pm</math> 9.9%<br/><i>NS</i></b> |

### Rest 4

| Subject ID (randomized)          | Right / Left normalized BFI (mean $\pm$ SD)                                                                    | Heartrate (bpm, mean $\pm$ SD)                | Frontal / Parietal EEG gamma spectral power (30-50Hz) z-score * | Listening task accuracy |
|----------------------------------|----------------------------------------------------------------------------------------------------------------|-----------------------------------------------|-----------------------------------------------------------------|-------------------------|
| S16                              | 14.4 $\pm$ 19.8% / 19.5 $\pm$ 37.0%                                                                            | 79.3 $\pm$ 4.2                                | (unstable) / (unstable)                                         | NA                      |
| S46                              | —                                                                                                              | —                                             | —                                                               | NA                      |
| S59                              | 11.9 $\pm$ 6.2% / 12.8 $\pm$ 17.0%                                                                             | 61.4 $\pm$ 3.9                                | 1.9 / -1.75                                                     | NA                      |
| S87                              | —                                                                                                              | —                                             | —                                                               | NA                      |
| S44                              | 16.6 $\pm$ 4.2% / 1.3 $\pm$ 18.9%                                                                              | 77.9 $\pm$ 3.6                                | 3.7 / 0.2                                                       | NA                      |
| S22                              | —                                                                                                              | —                                             | —                                                               | NA                      |
| S57                              | 50.6 $\pm$ 12.3% / 15.9 $\pm$ 13.5%                                                                            | 73.7 $\pm$ 2.7                                | 0.06 / (unstable)                                               | NA                      |
| S55                              | 6.5 $\pm$ 14.6% / 4.9 $\pm$ 14.1%                                                                              | 81.2 $\pm$ 3.2                                | 3.6 / 3.4                                                       | NA                      |
| S80                              | 39.6 $\pm$ 15.9% / 17.4 $\pm$ 9.5%                                                                             | 76.2 $\pm$ 11.9                               | 2.5 / 0.4                                                       | NA                      |
| S30                              | 3.6 $\pm$ 8.9% / 0.4 $\pm$ 5.4%                                                                                | **                                            | 4.3 / 1.5                                                       | NA                      |
| S47                              | 39.1 $\pm$ 12.0% / 38.4 $\pm$ 12.0%                                                                            | 75.9 $\pm$ 3.5                                | (unstable) / (unstable)                                         | NA                      |
| S20                              | —                                                                                                              | —                                             | —                                                               | NA                      |
| S83                              | —                                                                                                              | —                                             | —                                                               | NA                      |
| <b>Average over all subjects</b> | <b>22.8 <math>\pm</math> 17.6% / 13.8 <math>\pm</math> 12.3%</b><br><b><i>P</i> = 0.008 / <i>P</i> = 0.015</b> | <b>75.1 <math>\pm</math> 6.5</b><br><b>NS</b> |                                                                 |                         |

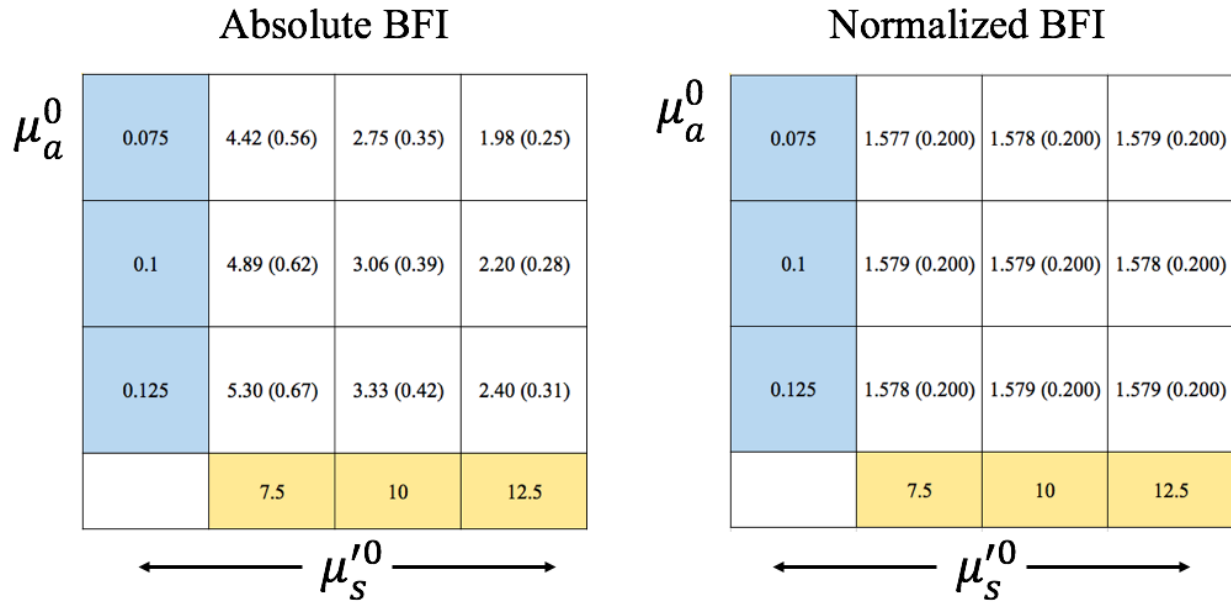

**Figure S2:** Exploration of the effect of errors in estimated baseline tissue optical properties. To assess the potential impact on our reported results due to this range of variability, we re-processed a representative subject's data (S80) using a semi-infinite homogeneous model. We explored how varying the values of both parameters by  $\pm 25\%$  would impact the results. The parameters we originally used for our calculations in this manuscript were  $\mu_a^0 = 0.1 \text{ cm}^{-1}$  and  $\mu_s'^0 = 10 \text{ cm}^{-1}$ . We assessed this matrix of 9 scenarios ( $\mu_a^0 = 0.075, 0.1, 0.125 \text{ cm}^{-1}$ ;  $\mu_s'^0 = 7.5, 10, 12.5 \text{ cm}^{-1}$ ) in terms of both absolute BFI as well as normalized BFI. BFI values are written as mean (SD).
